# Supplementary material for: A Novel Intra-U1 snRNP Cross-Regulation Mechanism: Alternative Splicing Switch Links U1C and U1-70K Expression
Source: PubMed Central journal article supplement (PMC3798272; doi:10.1371/journal.pgen.1003856), 2013-10-17

# Supplementary Figure S1

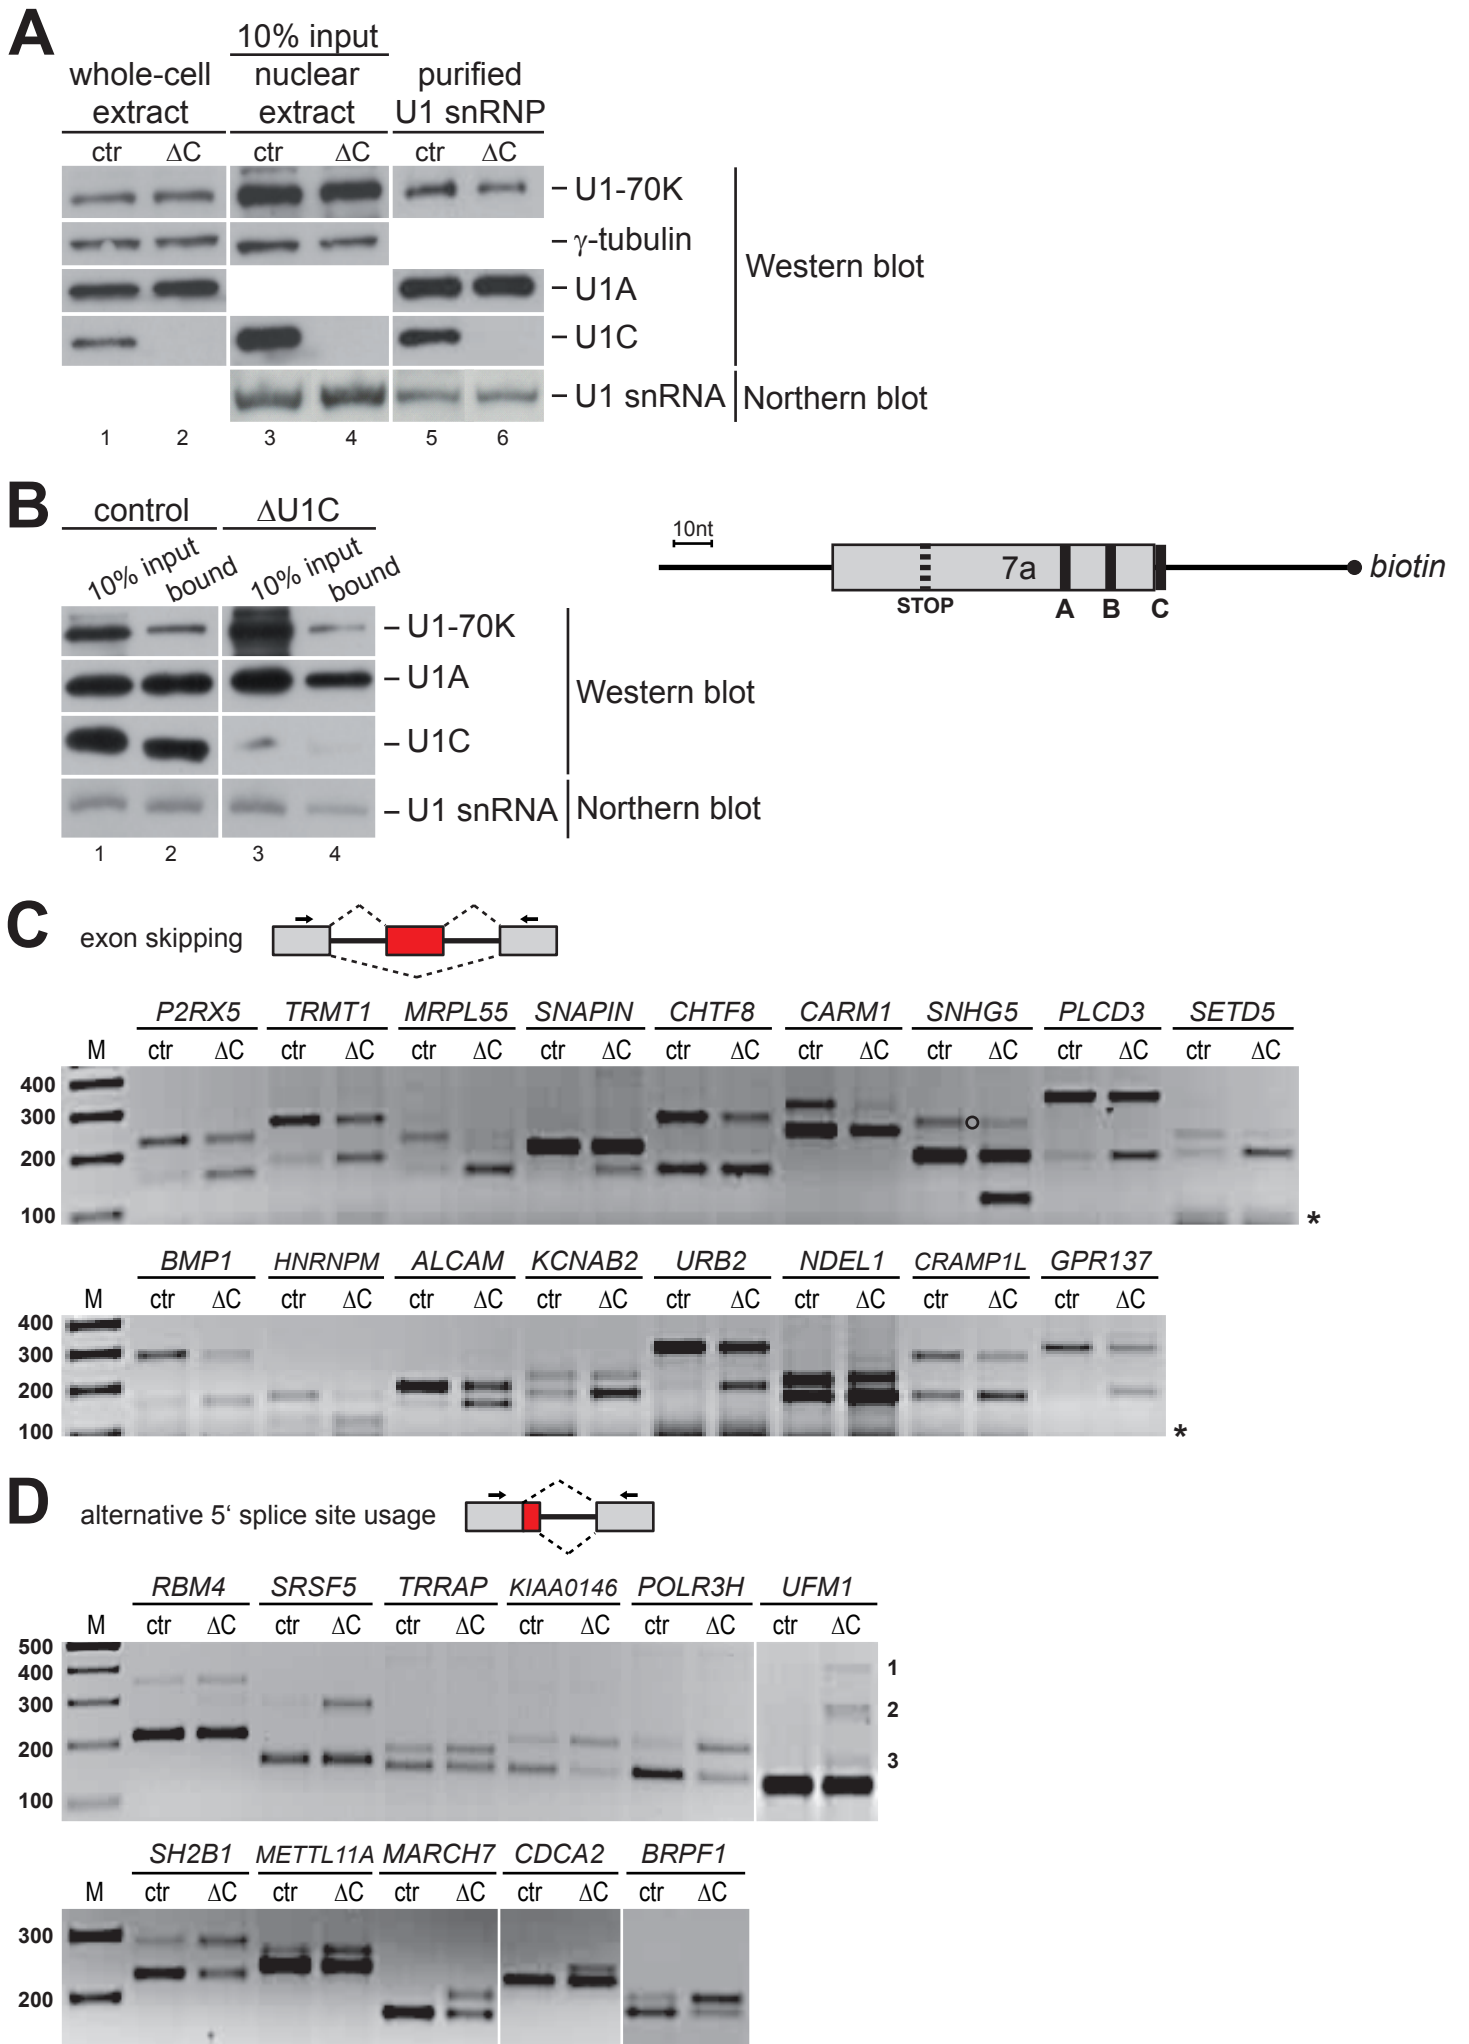

Supplement: pgen.1003856.s001.pdf [file pgen.1003856.s001.pdf]
