# Supplementary material for: A Novel Intra-U1 snRNP Cross-Regulation Mechanism: Alternative Splicing Switch Links U1C and U1-70K Expression
Source: PubMed Central journal article supplement (PMC3798272; doi:10.1371/journal.pgen.1003856), 2013-10-17

# Supplementary Figure S2

**A**

alternative  
3' splice site

Hs: TGTTCCTATTGTCAGTGCAGCCACCA-----CGCAGCTGGCTTGCAGCTGATGCTTACGCT-  
Mm: TGTTCCTATTGTCAGTGCAGCCACCA-----CGCAGCTGGCTTGCAGCTGATGCTTACGCT-  
Dr: TGTTCCTATTGTCAGTGCAGCCGCTATCTCTGATGGCTATTGGCCAGAGCTGGCTTGCAGATCATGATGATGTT  
\*\*\*\*\* \*\* \* \*\*\*\*\* \*\* \* \*\*\*\*\* \* \* \* \* \* \* \* \*

regulatory 5' splice sites

A B C

Hs: -----CCCCTTACAACACCTCAGTGTATGGTTGGTATAA-GGGTTTGTATCATGGGTAAGATCACT  
Mm: -----CCCCTTACAACACCTCAGTGTATGGTTGGTATAA-GGGTTTGTATCATGGGTAAGATCACA  
Dr: TTGATACATCTACACCCTACTACCACAGCTCAGTGTATGGTTGGTATGATGGGTTTGTATGATGGGTAAGATTTCT  
\* \* \* \* \* \* \* \* \* \* \* \* \* \* \* \* \* \* \* \* \* \* \* \* \* \* \* \* \* \* \* \* \* \* \* \* \* \* \* \* \* \* \*

**B**

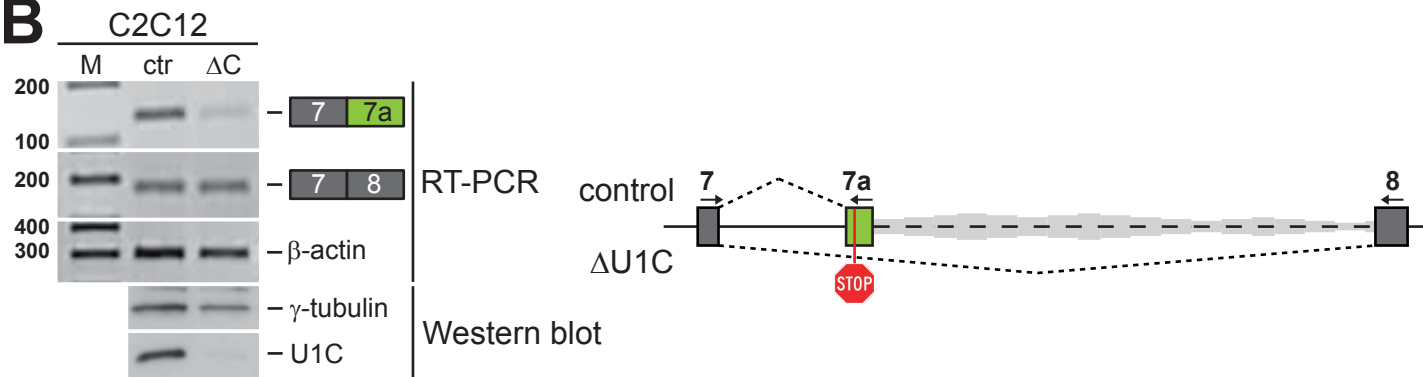

Supplement: pgen.1003856.s002.pdf [file pgen.1003856.s002.pdf]
