# Supplementary material for: A Novel Intra-U1 snRNP Cross-Regulation Mechanism: Alternative Splicing Switch Links U1C and U1-70K Expression
Source: PubMed Central journal article supplement (PMC3798272; doi:10.1371/journal.pgen.1003856), 2013-10-17
Supplement: pgen.1003856.s004.pdf [file pgen.1003856.s004.pdf]

**Supplementary Table S1. Single-exon skipping targets upon U1C knockdown**

| gene_id   | chromosome | strand | alternative_exon_position | skipping_junction_position |
|-----------|------------|--------|---------------------------|----------------------------|
| ADD1      | chr4       | +      | 2928369..2928402          | 2927839-2929898            |
| AGPAT2    | chr9       | -      | 139571037..139571132      | 139569259-139571413        |
| AKR1A1    | chr1       | +      | 46018108..46018235        | 46016827-46027461          |
| ALCAM     | chr3       | +      | 105270988..105271026      | 105269103-105271312        |
| ANXA2     | chr15      | -      | 60689457..60689537        | 60678285-60690142          |
| ARMC6     | chr19      | +      | 19154801..19154883        | 19153686-19162431          |
| ATG9A     | chr2       | -      | 220093156..220093207      | 220092775-220093732        |
| AXL       | chr19      | +      | 41745599..41745625        | 41745219-41748788          |
| BCAR1     | chr16      | -      | 75270780..75270896        | 75269884-75271081          |
| BCL7B     | chr7       | -      | 72957878..72957974        | 72954382-72966497          |
| BIN1      | chr2       | -      | 127808730..127808819      | 127808488-127816587        |
| BMP1      | chr8       | +      | 22064367..22064494        | 22059441-22064816          |
| C10orf137 | chr10      | +      | 127417572..127417673      | 127414407-127417927        |
| C16orf13  | chr16      | -      | 685281..685340            | 684797-686094              |
| C1orf43   | chr1       | -      | 154186369..154186422      | 154185100-154186933        |
| C3orf17   | chr3       | -      | 112736295..112736449      | 112732879-112738389        |
| C8orf59   | chr8       | -      | 86131465..86131592        | 86129731-86132535          |
| C9orf114  | chr9       | -      | 131586026..131586173      | 131585112-131586351        |
| CAMTA1    | chr1       | +      | 6880241..6880310          | 6845635-6885152            |
| CARM1     | chr19      | +      | 11032051..11032119        | 11031803-11032291          |
| CAST      | chr5       | +      | 96064857..96064913        | 96063234-96065316          |
| CCDC99    | chr5       | +      | 169017760..169017833      | 169015579-169018052        |
| CD46      | chr1       | +      | 207941124..207941168      | 207940540-207943666        |
| CD97      | chr19      | +      | 14507154..14507285        | 14501891-14508470          |
| CDA       | chr1       | +      | 20940335..20940392        | 20931532-20944945          |
| CDC25C    | chr5       | -      | 137665242..137665336      | 137664218-137666676        |
| CDIPT     | chr16      | -      | 29870763..29870844        | 29870655-29871902          |
| CHD3      | chr17      | +      | 7810919..7811020          | 7810806-7811212            |
| CHTF8     | chr16      | -      | 69154956..69155073        | 69154552-69155339          |
| CKB       | chr14      | -      | 103986806..103986929      | 103986648-103987600        |
| CLSTN1    | chr1       | -      | 9816539..9816568          | 9815367-9833330            |
| CPNE7     | chr16      | +      | 89657535..89657668        | 89657466-89661775          |
| CRAMP1L   | chr16      | +      | 1717336..1717401          | 1716601-1717963            |
| CSNK1G3   | chr5       | +      | 122941033..122941056      | 122940524-122950036        |
| DMWD      | chr19      | -      | 46287899..46287973        | 46287548-46288852          |
| DNAJA3    | chr16      | +      | 4504812..4504928          | 4500498-4505547            |
| DPH3      | chr3       | -      | 16305662..16305736        | 16302336-16306276          |
| DROSHA    | chr5       | -      | 31515561..31515671        | 31515326-31521230          |

|           |       |   |                      |                     |
|-----------|-------|---|----------------------|---------------------|
| EIF4E2    | chr2  | + | 233438973..233439051 | 233431924-233445614 |
| EIF4G2    | chr11 | - | 10823208..10823321   | 10822634-10823596   |
| EIF4H     | chr7  | + | 73604577..73604636   | 73604248-73609071   |
| ERCC1     | chr19 | - | 45917221..45917292   | 45917003-45918119   |
| EWSR1     | chr22 | + | 29678379..29678546   | 29674205-29682912   |
| EXOC7     | chr17 | - | 74087224..74087316   | 74085401-74090495   |
| FAM107B   | chr10 | - | 14595321..14595386   | 14572514-14646239   |
| FAM122B   | chrX  | - | 133923610..133923666 | 133923296-133927845 |
| FBXO22    | chr15 | + | 76196832..76196970   | 76196444-76205544   |
| FHL2      | chr2  | - | 106013104..106013154 | 106002997-106015299 |
| FIS1      | chr7  | - | 100887288..100887420 | 100884187-100888241 |
| FKBP10    | chr17 | + | 39973310..39973455   | 39969531-39974341   |
| FLNA      | chrX  | - | 153581922..153582095 | 153581825-153582283 |
| FLNB      | chr3  | + | 58117654..58117746   | 58116635-58118535   |
| GGCT      | chr7  | - | 30540152..30540297   | 30538554-30544185   |
| GPR137    | chr11 | + | 64056075..64056193   | 64055940-64056509   |
| GPR56     | chr16 | + | 57675503..57675620   | 57662714-57684165   |
| GSTM1     | chr1  | + | 110232893..110233186 | 110231947-110235828 |
| GSTP1     | chr11 | + | 67353575..67353682   | 67352712-67353860   |
| GTF2I     | chr7  | + | 74133198..74133260   | 74131270-74143124   |
| GUSB      | chr7  | - | 65435269..65435353   | 65432894-65439282   |
| HCFC1R1   | chr16 | - | 3073475..3073531     | 3073362-3073848     |
| HNRNPA1   | chr12 | + | 54676863..54677018   | 54676658-54677596   |
| HNRNPA2B1 | chr7  | - | 26237451..26237486   | 26237352-26240192   |
| HNRNPAB   | chr5  | + | 177637133..177637273 | 177636448-177637554 |
| HNRNPH1   | chr5  | - | 179042547..179042596 | 179041960-179043127 |
| HTRA2     | chr2  | + | 74759746..74759841   | 74759052-74759947   |
| IL17RC    | chr3  | + | 9970264..9970314     | 9970170-9971536     |
| IL17RC    | chr3  | + | 9974504..9974542     | 9974387-9974637     |
| INCENP    | chr11 | + | 61908972..61908983   | 61908516-61912454   |
| ISOC2     | chr19 | - | 55967003..55967212   | 55966697-55967716   |
| ITM2C     | chr2  | + | 231738132..231738272 | 231729860-231740335 |
| KCNAB2    | chr1  | + | 6101891..6101932     | 6100705-6132815     |
| LAMTOR1   | chr11 | - | 71809335..71809461   | 71808960-71809827   |
| LDHA      | chr11 | + | 18426996..18427119   | 18425358-18428664   |
| MADD      | chr11 | + | 47348289..47348358   | 47346128-47350209   |
| MAPK9     | chr5  | - | 179713975..179714067 | 179707608-179718848 |
| MAPKAP1   | chr9  | - | 128321912..128322088 | 128305447-128347834 |
| MFAP5     | chr12 | - | 8804258..8804287     | 8803185-8807033     |
| MFF       | chr2  | + | 228193394..228193505 | 228190143-228195342 |

|         |       |   |                      |                     |
|---------|-------|---|----------------------|---------------------|
| MFF     | chr2  | + | 228211942..228212100 | 228205096-228220393 |
| MINK1   | chr17 | + | 4795697..4795807     | 4795529-4795951     |
| MKL1    | chr22 | - | 40990678..40990739   | 40948371-41032482   |
| MKNK1   | chr1  | - | 47025906..47025949   | 47024472-47027150   |
| MLX     | chr17 | + | 40720488..40720577   | 40719673-40720855   |
| MPRIP   | chr17 | + | 17083921..17083983   | 17083402-17088137   |
| MRPL55  | chr1  | - | 228296656..228296722 | 228296019-228296850 |
| MRPS11  | chr15 | + | 89015858..89015956   | 89011255-89018341   |
| MRPS18C | chr4  | + | 84379499..84379582   | 84378111-84380893   |
| MTDH    | chr8  | + | 98711982..98712080   | 98703416-98718854   |
| MYL6    | chr12 | + | 56554410..56554454   | 56554104-56555171   |
| MYL9    | chr20 | + | 35176435..35176596   | 35173471-35177480   |
| NAP1L4  | chr11 | - | 2970457..2970494     | 2966876-2972489     |
| NCOR2   | chr12 | - | 124858959..124859009 | 124857156-124862783 |
| NDEL1   | chr17 | + | 8366638..8366672     | 8363478-8370248     |
| NF2     | chr22 | + | 30079009..30079053   | 30077590-30090741   |
| NFE2L1  | chr17 | + | 46134394..46134483   | 46133960-46134706   |
| NFIC    | chr19 | + | 3456548..3456633     | 3452664-3462750     |
| NIPA2   | chr15 | - | 23033278..23033413   | 23021429-23033894   |
| NPM1    | chr5  | + | 170827843..170827929 | 170827214-170832306 |
| NPNT    | chr4  | + | 106833345..106833395 | 106819158-106848493 |
| NPRL3   | chr16 | - | 167300..167374       | 162774-169125       |
| NRM     | chr6  | - | 30657053..30657229   | 30656719-30657824   |
| P2RX5   | chr17 | - | 3594250..3594321     | 3593974-3594938     |
| PABPC4  | chr1  | - | 40029508..40029594   | 40029413-40030143   |
| PCBP2   | chr12 | + | 53858544..53858636   | 53856351-53859716   |
| PCBP2   | chr12 | + | 53861589..53861627   | 53861077-53862561   |
| PICALM  | chr11 | - | 85701293..85701442   | 85695016-85707869   |
| PLCD3   | chr17 | - | 43190231..43190380   | 43190072-43190490   |
| POC1A   | chr3  | - | 52130585..52130728   | 52110001-52156395   |
| POP5    | chr12 | - | 121017577..121017726 | 121017400-121018918 |
| PPHLN1  | chr12 | + | 42745687..42745851   | 42729776-42748963   |
| PPP2R4  | chr9  | + | 131890243..131890347 | 131885417-131891264 |
| PQLC1   | chr18 | - | 77693969..77694022   | 77679400-77703329   |
| PRC1    | chr15 | - | 91512309..91512350   | 91510432-91512677   |
| PRPF38B | chr1  | + | 109236212..109236264 | 109235489-109238324 |
| PTBP1   | chr19 | + | 805492..805569       | 805187-806408       |
| PTPMT1  | chr11 | + | 47591252..47591443   | 47587538-47593023   |
| PUF60   | chr8  | - | 144906483..144906569 | 144904083-144911450 |
| PXDN    | chr2  | - | 1691404..1691475     | 1687923-1695700     |

|         |       |   |                      |                     |
|---------|-------|---|----------------------|---------------------|
| RAD1    | chr5  | - | 34913575..34913683   | 34911917-34914800   |
| RAF1    | chr3  | - | 12647700..12647798   | 12645788-12650265   |
| RBM39   | chr20 | - | 34317384..34317449   | 34317287-34319863   |
| RHOC    | chr1  | - | 113247722..113247790 | 113246428-113249700 |
| RNF212  | chr4  | - | 1102131..1102192     | 1090627-1107144     |
| ROBO1   | chr3  | - | 78696779..78696805   | 78695340-78700882   |
| RPL21   | chr13 | + | 27828357..27828418   | 27827980-27829379   |
| RPN2    | chr20 | + | 35860699..35860794   | 35858462-35862423   |
| RPS24   | chr10 | + | 79799962..79799983   | 79797062-79800373   |
| RWDD1   | chr6  | + | 116895221..116895334 | 116892818-116901458 |
| S100A4  | chr1  | - | 153517434..153517994 | 153517285-153518229 |
| SBF1    | chr22 | - | 50895463..50895540   | 50895102-50897684   |
| SDCCAG3 | chr9  | - | 139303451..139303519 | 139302390-139304542 |
| SDHA    | chr5  | + | 251107..251583       | 240591-254508       |
| SEC16A  | chr9  | - | 139340097..139340171 | 139338352-139341307 |
| SETD5   | chr3  | + | 9476274..9476314     | 9476169-9476508     |
| SFXN4   | chr10 | - | 120920567..120920593 | 120920481-120921852 |
| SHARPIN | chr8  | - | 145153984..145154108 | 145153897-145154180 |
| SHMT1   | chr17 | - | 18238873..18238989   | 18236602-18243357   |
| SIKE1   | chr1  | - | 115322731..115322836 | 115321905-115323070 |
| SKA2    | chr17 | - | 57196680..57196856   | 57189706-57208642   |
| SLC3A2  | chr11 | + | 62639049..62639141   | 62623853-62648491   |
| SNAPIN  | chr1  | + | 153631614..153631660 | 153631362-153631924 |
| SNHG5   | chr6  | - | 86387513..86387593   | 86387210-86387672   |
| SRRM1   | chr1  | + | 24989674..24989715   | 24989295-24993306   |
| SRRT    | chr7  | + | 100478317..100478390 | 100473333-100478906 |
| SSFA2   | chr2  | + | 182785324..182785389 | 182784173-182786675 |
| SUN2    | chr22 | - | 39150647..39150711   | 39148670-39151768   |
| THOC5   | chr22 | - | 29946717..29946832   | 29945147-29949437   |
| TMEM107 | chr17 | - | 8077838..8079344     | 8077590-8079518     |
| TPD52L2 | chr20 | + | 62507169..62507228   | 62505169-62514072   |
| TRMT1   | chr19 | - | 13220729..13220815   | 13220652-13220972   |
| TRPT1   | chr11 | - | 63993258..63993341   | 63993052-63993522   |
| TSPAN17 | chr5  | + | 176078617..176078901 | 176074703-176079744 |
| TSPAN4  | chr11 | + | 865513..865614       | 864511-865694       |
| TUFM    | chr16 | - | 28856635..28856801   | 28856376-28857233   |
| TXNRD1  | chr12 | + | 104682709..104682818 | 104681124-104705068 |
| UBTF    | chr17 | - | 42289712..42289822   | 42289374-42290187   |
| URB2    | chr1  | + | 229781606..229781716 | 229779440-229783257 |
| USP37   | chr2  | - | 219344373..219344438 | 219341704-219346793 |

|        |       |   |                      |                     |
|--------|-------|---|----------------------|---------------------|
| WDR45  | chrX  | - | 48935302..48935406   | 48934409-48935496   |
| WDR90  | chr16 | + | 710058..710161       | 709376-710612       |
| WNK1   | chr12 | + | 980431..980514       | 971436-987378       |
| YAP1   | chr11 | + | 102080248..102080295 | 102076805-102094353 |
| YIPF1  | chr1  | - | 54320674..54320724   | 54317943-54325729   |
| YKT6   | chr7  | + | 44250622..44250723   | 44247797-44251846   |
| ZMIZ2  | chr7  | + | 44799750..44799827   | 44799059-44800024   |
| ZNF207 | chr17 | + | 30688487..30688534   | 30687986-30689933   |
| ZNF207 | chr17 | + | 30693684..30693776   | 30692506-30694791   |
| ZNF384 | chr12 | - | 6781516..6781698     | 6780004-6782382     |
| ZRANB2 | chr1  | - | 71531361..71531435   | 71530820-71532459   |
