# Supplementary material for: A Novel Intra-U1 snRNP Cross-Regulation Mechanism: Alternative Splicing Switch Links U1C and U1-70K Expression
Source: PubMed Central journal article supplement (PMC3798272; doi:10.1371/journal.pgen.1003856), 2013-10-17
Supplement: pgen.1003856.s005.pdf [file pgen.1003856.s005.pdf]

**Supplementary Table S2. Single-exon inclusion targets upon U1C knockdown**

| gene_id  | chromosome | strand | alternative_exon_position | skipping_junction_position |
|----------|------------|--------|---------------------------|----------------------------|
| ABLIM1   | chr10      | -      | 116213138..116213242      | 116211430-116225457        |
| ANAPC5   | chr12      | -      | 121747773..121747814      | 121747666-121756080        |
| ASNS     | chr7       | -      | 97501031..97501308        | 97499125-97501663          |
| C16orf61 | chr16      | -      | 81034853..81034939        | 81031034-81040339          |
| C20orf3  | chr20      | -      | 24945011..24945034        | 24944658-24949528          |
| CALM2    | chr2       | -      | 47399553..47399598        | 47397903-47403580          |
| CCNL2    | chr1       | -      | 1323872..1324123          | 1323445-1325610            |
| CLTC     | chr17      | +      | 57764362..57764382        | 57763169-57767997          |
| DROSHA   | chr5       | -      | 31467249..31467273        | 31466388-31468046          |
| EZH2     | chr7       | -      | 148516070..148516151      | 148515209-148516688        |
| FAM13B   | chr5       | -      | 137292166..137292231      | 137290065-137295305        |
| FLNB     | chr3       | +      | 58127585..58127656        | 58124256-58128377          |
| FNBP4    | chr11      | -      | 47747289..47747388        | 47746330-47752926          |
| GOPC     | chr6       | -      | 117898611..117898634      | 117896515-117900063        |
| GTF3C5   | chr9       | +      | 135930331..135930351      | 135930196-135931399        |
| HERC4    | chr10      | -      | 69718870..69718893        | 69716733-69726440          |
| HNRNPH1  | chr5       | -      | 179048844..179048977      | 179048398-179050038        |
| HNRPDL   | chr4       | -      | 83346716..83346820        | 83346036-83347190          |
| IVNS1ABP | chr1       | -      | 185275617..185275757      | 185274775-185276146        |
| KIF21A   | chr12      | -      | 39724044..39724064        | 39720126-39724548          |
| NFYC     | chr1       | +      | 41232590..41232646        | 41232375-41235028          |
| ORMDL1   | chr2       | -      | 190647740..190647849      | 190647328-190648995        |
| PRMT1    | chr19      | +      | 50183129..50183182        | 50180573-50183744          |
| RBM3     | chrX       | +      | 48434203..48434471        | 48434055-48434702          |
| RBM39    | chr20      | -      | 34301216..34301779        | 34301018-34302107          |
| RBMS1    | chr2       | -      | 161138768..161138815      | 161137875-161141286        |
| SLC25A38 | chr3       | +      | 39430853..39430880        | 39425284-39430986          |
| SNX14    | chr6       | -      | 86248556..86248582        | 86246642-86251703          |
| SPTAN1   | chr9       | +      | 131371930..131371944      | 131371563-131373993        |
| SRRM1    | chr1       | +      | 24973570..24973699        | 24973280-24975350          |
| TEAD1    | chr11      | +      | 12900436..12900447        | 12886447-12901255          |
| TMED5    | chr1       | -      | 93621593..93621641        | 93620445-93621857          |
| TNRC6A   | chr16      | +      | 24804794..24804970        | 24803138-24805865          |
| TRIM16L  | chr17      | +      | 18627083..18627144        | 18625645-18630838          |
| UBE2B    | chr5       | +      | 133724668..133724743      | 133724104-133725916        |
| UBE2I    | chr16      | +      | 1362348..1362604          | 1359774-1364021            |
| WNK1     | chr12      | +      | 988739..989197            | 987527-989887              |
