# Supplementary material for: A Novel Intra-U1 snRNP Cross-Regulation Mechanism: Alternative Splicing Switch Links U1C and U1-70K Expression
Source: PubMed Central journal article supplement (PMC3798272; doi:10.1371/journal.pgen.1003856), 2013-10-17
Supplement: pgen.1003856.s006.pdf [file pgen.1003856.s006.pdf]

| <b>Supplementary Table S3. Proximal 5' splice site usage upon U1C knockdown</b> |                   |               |                                      |                                        |
|---------------------------------------------------------------------------------|-------------------|---------------|--------------------------------------|----------------------------------------|
| <b>gene_id</b>                                                                  | <b>chromosome</b> | <b>strand</b> | <b>distal_5'SS_junction_position</b> | <b>proximal_5'SS_junction_position</b> |
| ALDOA                                                                           | chr16             | +             | 30080299-30080627                    | 30080311-30080627                      |
| ALG13                                                                           | chrX              | +             | 110924527-110925360                  | 110924652-110925360                    |
| ARIH2                                                                           | chr3              | +             | 49008137-49011132                    | 49008274-49011132                      |
| ARMCX3                                                                          | chrX              | +             | 100878266-100878776                  | 100878420-100878776                    |
| ASCC1                                                                           | chr10             | -             | 73973089-73975965                    | 73973089-73975540                      |
| AURKA                                                                           | chr20             | -             | 54965721-54967210                    | 54965721-54966999                      |
| BAG1                                                                            | chr9              | -             | 33262828-33264222                    | 33262828-33264204                      |
| BRPF1                                                                           | chr3              | +             | 9783837-9784628                      | 9783855-9784628                        |
| BUD31                                                                           | chr7              | +             | 99006627-99007657                    | 99006868-99007657                      |
| BZW2                                                                            | chr7              | +             | 16685913-16705062                    | 16685929-16705062                      |
| C7orf49                                                                         | chr7              | -             | 134853812-134855404                  | 134853812-134855151                    |
| CCNK                                                                            | chr14             | +             | 99947816-99958963                    | 99947951-99958963                      |
| CDKN1A                                                                          | chr6              | +             | 36646575-36651874                    | 36646716-36651874                      |
| CENPW                                                                           | chr6              | +             | 126661545-126667351                  | 126661590-126667351                    |
| CKS1B                                                                           | chr1              | +             | 154947280-154950463                  | 154947388-154950463                    |
| CNOT1                                                                           | chr16             | -             | 58568299-58570893                    | 58568299-58570872                      |
| COX7A2                                                                          | chr6              | -             | 75950101-75950892                    | 75950101-75950839                      |
| CRK                                                                             | chr17             | -             | 1326944-1340084                      | 1326944-1339914                        |
| DDX56                                                                           | chr7              | -             | 44609502-44609614                    | 44609502-44609583                      |
| DLG4                                                                            | chr17             | -             | 7107571-7111493                      | 7107571-7111394                        |
| DLGAP4                                                                          | chr20             | +             | 35154409-35155216                    | 35154480-35155216                      |
| DNAJC11                                                                         | chr1              | -             | 6697564-6698355                      | 6697564-6698143                        |
| DNMT1                                                                           | chr19             | -             | 10246963-10247761                    | 10246963-10247752                      |
| DYRK1A                                                                          | chr21             | +             | 38878526-38884214                    | 38878657-38884214                      |
| EHMT2                                                                           | chr6              | -             | 31852576-31852689                    | 31852576-31852668                      |
| EIF4B                                                                           | chr12             | +             | 53428493-53431193                    | 53428508-53431193                      |
| EPHX1                                                                           | chr1              | +             | 225997871-226016426                  | 225998317-226016426                    |
| EXOC3                                                                           | chr5              | +             | 462422-464405                        | 462644-464405                          |
| EXOSC2                                                                          | chr9              | +             | 133570980-133572969                  | 133570993-133572969                    |
| FAM214A                                                                         | chr15             | -             | 52877141-52879348                    | 52877141-52879253                      |
| FAM82A2                                                                         | chr15             | -             | 41046988-41047397                    | 41046988-41047281                      |
| FIBP                                                                            | chr11             | -             | 65652657-65653001                    | 65652657-65652980                      |
| FPGS                                                                            | chr9              | +             | 130569967-130570513                  | 130570054-130570513                    |
| GUSB                                                                            | chr7              | -             | 65441189-65444386                    | 65441189-65444373                      |
| HDLBP                                                                           | chr2              | -             | 242169376-242169568                  | 242169376-242169484                    |
| HMGB2                                                                           | chr4              | -             | 174254820-174255423                  | 174254820-174255397                    |
| HNRNPC                                                                          | chr14             | -             | 21698525-21699156                    | 21698525-21699117                      |
| HNRNPH1                                                                         | chr5              | -             | 179050165-179050596                  | 179050165-179050282                    |

|          |       |   |                     |                     |
|----------|-------|---|---------------------|---------------------|
| HNRNPU   | chr1  | - | 245026032-245026976 | 245026032-245026919 |
| HSD17B10 | chrX  | - | 53458542-53458773   | 53458542-53458746   |
| ITPR1    | chr3  | + | 4716905-4718298     | 4716932-4718298     |
| KRT7     | chr12 | + | 52631353-52632464   | 52631501-52632464   |
| LAMA4    | chr6  | - | 112575493-112575661 | 112575493-112575644 |
| LEPRE1   | chr1  | - | 43212523-43212943   | 43212523-43212924   |
| MAD2L2   | chr1  | - | 11736197-11736905   | 11736197-11736866   |
| MARCH7   | chr2  | + | 160615846-160619391 | 160615869-160619391 |
| MCM4     | chr8  | + | 48873774-48874076   | 48873986-48874076   |
| MEST     | chr7  | + | 130126236-130135209 | 130126360-130135209 |
| METTL11A | chr9  | + | 132388574-132394929 | 132388600-132394929 |
| MOCS2    | chr5  | - | 52404473-52405542   | 52404473-52405081   |
| MRPL21   | chr11 | - | 68660461-68660871   | 68660461-68660790   |
| MRPL36   | chr5  | - | 1799061-1799906     | 1799061-1799885     |
| MRPS14   | chr1  | - | 174987712-174992500 | 174987712-174992408 |
| MTCH1    | chr6  | - | 36938470-36940479   | 36938470-36940428   |
| NNMT     | chr11 | + | 114168880-114182767 | 114168916-114182767 |
| NUMA1    | chr11 | - | 71780957-71791504   | 71780957-71791366   |
| NUP155   | chr5  | - | 37364486-37370923   | 37364486-37370768   |
| OS9      | chr12 | + | 58112159-58112776   | 58112204-58112776   |
| OSGEP    | chr14 | - | 20916970-20917123   | 20916970-20917061   |
| PABPC4   | chr1  | - | 40035674-40036906   | 40035674-40036769   |
| PARK7    | chr1  | + | 8021795-8022823     | 8021853-8022823     |
| PCID2    | chr13 | - | 113854830-113862913 | 113854830-113862338 |
| PLEKHB2  | chr2  | + | 131890564-131897740 | 131890588-131897740 |
| PLK1     | chr16 | + | 23700997-23701181   | 23701093-23701181   |
| PLK1     | chr16 | + | 23690661-23691405   | 23690821-23691405   |
| POLR3H   | chr22 | - | 41928161-41928663   | 41928161-41928608   |
| PPP1R8   | chr1  | + | 28157402-28159267   | 28157877-28159267   |
| PQBP1    | chrX  | + | 48755365-48755775   | 48755376-48755775   |
| PRPF40A  | chr2  | - | 153572640-153573870 | 153572640-153573744 |
| PRRC2C   | chr1  | + | 171553665-171556142 | 171553680-171556142 |
| PSMA7    | chr20 | - | 60714253-60714837   | 60714253-60714752   |
| RBM4     | chr11 | + | 66406223-66407171   | 66406364-66407171   |
| RHOC     | chr1  | - | 113246428-113247722 | 113246428-113247675 |
| RMND5B   | chr5  | + | 177565259-177569584 | 177565397-177569584 |
| RNF31    | chr14 | + | 24617622-24617851   | 24617686-24617851   |
| RPL13    | chr16 | + | 89628799-89629292   | 89628853-89629292   |
| RPL15    | chr3  | + | 23958730-23959341   | 23958786-23959341   |
| RPL34    | chr4  | + | 109541756-109543107 | 109541868-109543107 |

|          |       |   |                     |                     |
|----------|-------|---|---------------------|---------------------|
| RPL35A   | chr3  | + | 197678182-197680874 | 197678199-197680874 |
| RPS20    | chr8  | - | 56986718-56986940   | 56986718-56986813   |
| RPS6     | chr9  | - | 19379616-19380188   | 19379616-19380086   |
| RPS9     | chr19 | + | 54704756-54705028   | 54704829-54705028   |
| RTEL1    | chr20 | + | 62326833-62327131   | 62327003-62327131   |
| SDCCAG3  | chr9  | - | 139300430-139301597 | 139300430-139301398 |
| SEC31A   | chr4  | - | 83803093-83812241   | 83803093-83811904   |
| SH2B1    | chr16 | + | 28884026-28884491   | 28884079-28884491   |
| SMARCB1  | chr22 | + | 24143268-24145482   | 24143322-24145482   |
| SMG7     | chr1  | + | 183511499-183513488 | 183511637-183513488 |
| SNF8     | chr17 | - | 47010708-47013532   | 47010708-47013493   |
| SRSF5    | chr14 | + | 70233972-70234855   | 70234097-70234855   |
| STT3B    | chr3  | + | 31674639-31677476   | 31674676-31677476   |
| STX16    | chr20 | + | 57227143-57234679   | 57227194-57234679   |
| TATDN1   | chr8  | - | 125528271-125531059 | 125528271-125530983 |
| TAZ      | chrX  | + | 153641589-153641819 | 153641695-153641819 |
| TCEAL4   | chrX  | + | 102840552-102841147 | 102840611-102841147 |
| TFRC     | chr3  | - | 195803993-195808914 | 195803993-195808702 |
| THAP4    | chr2  | - | 242524140-242541311 | 242524140-242541230 |
| TMED10   | chr14 | - | 75601709-75602463   | 75601709-75602366   |
| TMEM106C | chr12 | + | 48359955-48360466   | 48360012-48360466   |
| TMEM55B  | chr14 | - | 20929004-20929343   | 20929004-20929322   |
| TMEM93   | chr17 | + | 3572193-3572392     | 3572306-3572392     |
| TRAF2    | chr9  | + | 139794972-139802522 | 139795128-139802522 |
| TRRAP    | chr7  | + | 98581082-98581716   | 98581115-98581716   |
| UBAP2L   | chr1  | + | 154207235-154207672 | 154207268-154207672 |
| UFM1     | chr13 | + | 38924192-38928376   | 38924364-38928376   |
| UNC45A   | chr15 | + | 91478560-91478774   | 91478605-91478774   |
| UQCR10   | chr22 | + | 30163537-30165667   | 30163596-30165667   |
| USP5     | chr12 | + | 6972472-6972994     | 6972541-6972994     |
| VARS     | chr6  | - | 31749729-31749864   | 31749729-31749818   |
| WDR26    | chr1  | - | 224612356-224619227 | 224612356-224619179 |
| WDR4     | chr21 | - | 44296877-44299517   | 44296877-44299197   |
