# Supplementary material for: A Novel Intra-U1 snRNP Cross-Regulation Mechanism: Alternative Splicing Switch Links U1C and U1-70K Expression
Source: PubMed Central journal article supplement (PMC3798272; doi:10.1371/journal.pgen.1003856), 2013-10-17
Supplement: pgen.1003856.s007.pdf [file pgen.1003856.s007.pdf]

**Supplementary Table S4. Distal 5' splice site usage upon U1C knockdown**

| <b>gene_id</b> | <b>chromosome</b> | <b>strand</b> | <b>distal_5'SS_junction_position</b> | <b>proximal_5'SS_junction_position</b> |
|----------------|-------------------|---------------|--------------------------------------|----------------------------------------|
| ANKRD13B       | chr17             | +             | 27935017-27935213                    | 27935128-27935213                      |
| C11orf24       | chr11             | -             | 68035719-68039325                    | 68035719-68039114                      |
| C12orf57       | chr12             | +             | 7053728-7054934                      | 7053815-7054934                        |
| CHD3           | chr17             | +             | 7812656-7813746                      | 7812702-7813746                        |
| GSN            | chr9              | +             | 124088960-124089586                  | 124089070-124089586                    |
| HMGA1          | chr6              | +             | 34208659-34210489                    | 34208692-34210489                      |
| NOP56          | chr20             | +             | 2636680-2637047                      | 2636860-2637047                        |
| RPL14          | chr3              | +             | 40498965-40499381                    | 40499238-40499381                      |
| RPL7           | chr8              | -             | 74205032-74206101                    | 74205032-74205834                      |
| SRSF9          | chr12             | -             | 120901925-120903559                  | 120901925-120903430                    |
| TUSC2          | chr3              | -             | 50363617-50363816                    | 50363617-50363788                      |
| UBE2D3         | chr4              | -             | 103747793-103748749                  | 103747793-103748584                    |
