# Supplementary material for: A Novel Intra-U1 snRNP Cross-Regulation Mechanism: Alternative Splicing Switch Links U1C and U1-70K Expression
Source: PubMed Central journal article supplement (PMC3798272; doi:10.1371/journal.pgen.1003856), 2013-10-17
Supplement: pgen.1003856.s008.pdf [file pgen.1003856.s008.pdf]

**Supplementary Table S5. List of primers used for validation RT-PCRs, U1-70K alternative splicing detection, and minigene cloning**

The primer names provide information on the target gene as well as on the location and direction (forward or reverse).

| application           | primer                 | sequence                    |
|-----------------------|------------------------|-----------------------------|
| U1C target validation | BMP1 E16 fwd           | ACAAGGACGAGTGCTCCAAGG       |
|                       | BMP1 E18 rev           | TGGGACTCGATGTCCATCTCC       |
|                       | HNRNPM E12 fwd         | GGCCCTTTGGTGGTGGTATGG       |
|                       | HNRNPM E14 rev         | CAGGACCCATCCTCTCGATCC       |
|                       | ALCAM E12 fwd          | GCACAGCAGAAAACCAACTGGAG     |
|                       | ALCAM E14 rev          | AGCCAGTAGACGACACCAGCAAC     |
|                       | KCNAB2 E2 fwd          | CCGAGCAAGTCTGGATAAGTGAGG    |
|                       | KCNAB2 E5 rev          | CCTCCGAAGGTCACCCATGTTC      |
|                       | URB2 E5 fwd            | GAGCCTCATTTGGGAGCCTTG       |
|                       | URB2 E7 rev            | CATCTAAGACAGGCCCGACCAC      |
|                       | NDEL1 E8 fwd           | GAATTTTGCAAAGGACCAAGCATCAGC |
|                       | NDEL1 E10 rev          | AGCCCAGACCAGGAGGAGGAG       |
|                       | CRAMP1L E13 fwd        | CCAGTCCCACAACGTTTGTTC       |
|                       | CRAMP1L E15 rev        | CACCCGTCACCTCGTCTGAAG       |
|                       | GPR137 exon 5 fwd      | TCCTCTTCGTGTGGGAGCTACTG     |
|                       | GPR137 exon 7 rev      | GGGAGAAGAGCAGAGGAGTGGTC     |
|                       | P2RX5 exon 2 fwd       | CTCCCTGCAGAGTGCTGTCATC      |
|                       | P2RX5 exon 4 rev       | CAGTCGCTGTCCTTGGAGCAC       |
|                       | TRMT1 exon 7 fwd       | CCTGAGAATCGTCCTGCACAGC      |
|                       | TRMT1 exon 9 rev       | GACCACAGGCTGCAGAGAACTTG     |
|                       | SETD5 exon 5 fwd       | ATCCCTCGTTCTGACCTGAATGGC    |
|                       | SETD5 exon 6 rev       | CTTCCGCCGATGAAGTCTAATAACC   |
|                       | MRPL55 exon 1 fwd      | GCCTCGTCCCTGGTCTTAGTTCC     |
|                       | MRPL55 exon 3 rev      | CATTCCTCCTTACAGCCCCAGTG     |
|                       | SNAPIN exon 1 fwd      | CCGAAGGGCTGCTGGAGTTC        |
|                       | SNAPIN exon 3 rev      | GCGTCGCCGGGCATTAAGTAGC      |
|                       | CHTF8 exon 2 fwd       | GACAGAAAGCTCATGGTGCAAATTG   |
|                       | CHTF8 exon 4 rev       | CAAGCTCATCACAGTCCTGATCC     |
|                       | PLCD3 exon 13 fwd      | CCGAGAAGCCACACTCCATTGTG     |
|                       | PLCD3 exon 15 rev      | CTGGATGCGGATTTGGATGAAGAGC   |
|                       | CARM1 exon 14 fwd      | AGTGTTATTGCCAGTGGCTCCAGC    |
|                       | CARM1 exon 16 rev      | CATCATTTGGTTTCCTGGTGCTGTC   |
|                       | SNHG5 exon 3 fwd       | GGAAAATCGCTTGGTTAAACCTGACAC |
|                       | SNHG5 exon 5 rev       | AGAAATCGTTGCAACTTTGGAAGTTC  |
|                       | UFM1 E2 fwd            | GGTTTCCTTTAAGATCACGCTGACG   |
|                       | UFM1 E3 rev            | CTGCTGCAAACCTTTAAGACTGCTGTG |
|                       | RBM4 E1 fwd            | GAGGCCCTGCTGGTTTCTGTG       |
|                       | RBM4 E2 rev            | GTAATGGTGCAGGTTGCGTATGGC    |
|                       | SH2B1 E8 fwd           | CAGCACCTGTGGTTCCAGTCC       |
|                       | SH2B1 E9 rev           | CACAGTCACTCGCTCCGAAGG       |
|                       | METTLL11A E1 fwd       | CCTCCCTTCTCTTCCCCATC        |
|                       | METTLL11A E2 rev       | GGGAGCTGTTGATGTGCGATGC      |
|                       | MARCH7 E7 fwd          | TTGGAGCTTAACCTGGAGGATTTTG   |
|                       | MARCH7 E8 rev          | CGGACACGTGTGCTTGGTTC        |
|                       | CDCA2 E14 fwd          | ATTCCCGAGCTGCCTGAAGTC       |
|                       | CDCA2 E15 rev          | GCATTGCCAAGCGATGAGGAAC      |
|                       | TCF25 E11 fwd          | CATGCTGCTGCTCATCGACCAC      |
| TCF25 E12 rev         | TGCTCACACTCAGGGAGGTCTG |                             |

|                                        |                                                             |                                          |
|----------------------------------------|-------------------------------------------------------------|------------------------------------------|
|                                        | SRSF5 exon 1 fwd                                            | AGTTGTGGAGTGGCGTAGACGAG                  |
|                                        | SRSF5 exon 2 rev                                            | GTCTCCCGATGAATACCCGACAG                  |
|                                        | BRPF1 exon 6 fwd                                            | TGCAGCTGACTCCTTTCCTCATC                  |
|                                        | BRPF1 exon 7 rev                                            | GCCTCCAAGTTCTGCTTCATGGTG                 |
|                                        | TRRAP exon 58 fwd                                           | ATGAAGACGGTGGTGAAGACCTGG                 |
|                                        | TRRAP exon 59 rev                                           | TGAACTGGGATCATGCTGAGAGC                  |
|                                        | KIAA0156 exon 18 fwd                                        | CGCCTTTTCCTGTGGGGACTG                    |
|                                        | KIAA0156 exon 19 rev                                        | CAAACCTCAGCAGGGAGGAAATGC                 |
|                                        | POLR3H exon 4 fwd                                           | CATTTTCGCTGCGTGGTGTTCATCC                |
|                                        | POLR3H exon 5 rev                                           | AACTTGGCTGGCTGCTGCAGTG                   |
| <b>U1-70K alternative splicing</b>     | U1-70K exon 7 fwd                                           | CATGGTCTACAGTAAGCGGTCAGGAAAGC            |
|                                        | U1-70K exon 7a rev<br>(suitable for human and mouse)        | GAGGTGTTGTAAGGGGAGCGTAAG                 |
|                                        | U1-70K exon 8 rev                                           | CAAGGACCCTCCTGCCATCAATC                  |
|                                        | mU1-70K exon 7 fwd                                          | CACATGGTATACAGTAAACGCTCTGG               |
|                                        | mU1-70K exon 8 rev                                          | CCTCCAGCCCTTCACAGTCC                     |
|                                        | zfU1-70K exon 7 fwd                                         | AACTGGAAAACCAAGAGGCTATGCG                |
|                                        | zfU1-70K exon 7a rev                                        | GAGCTGTGGTAGTAGGGTGTAGATG                |
|                                        | zfU1-70K exon 8 rev                                         | GGCGCCATCCTTTTACCGTTCC                   |
|                                        | $\beta$ -actin exon 4 fwd<br>(suitable for human and mouse) | TGGACTIONCGAGCAAGAGATG                   |
|                                        | $\beta$ -actin exon 5 rev<br>(suitable for human and mouse) | GTGATCTCCTTCTGCATCCTG                    |
|                                        | zf $\beta$ -actin exon 1 fwd                                | GATCTTCACTCCCCTTGTTCA                    |
| zf $\beta$ -actin exon 2 rev           | ATGTCTGGGTCGTCCAACAA                                        |                                          |
| <b>U1C &amp; U1-70K mRNA detection</b> | U1C exon 1 fwd                                              | GAATTCAGAGCAACATGCC                      |
|                                        | U1C exon 3 fwd                                              | CAGAAATGGATGGAAGAGCAG                    |
|                                        | U1C exon 4 rev                                              | CAAGGAAAGATACCTCCTACTCC                  |
|                                        | U1-70K exon 2 fwd                                           | TTGGCAAGATGACCCAGTTCCTG                  |
|                                        | U1-70K exon 3 rev                                           | GCTCCTCTCGGTTTCAGCAC                     |
| <b>U1-70K minigene cloning</b>         | U1-70K exon 7 BamHI fwd                                     | CTAGTCGGATCCATACACATGGTCTACAGTAA<br>GCGG |
|                                        | U1-70K intron 7<br>downstream cut fwd 1                     | GGCCCTTTCCTCCCTGTAGCTTTAGCTGA            |
|                                        | U1-70K intron 7<br>downstream cut rev                       | GAATCCCCGCCACCCAGCCCTGGCCTAGG            |
|                                        | U1-70K intron 7<br>downstream cut fwd 2                     | GGCTGGGTGGCGGGGATTCTGTAGAGCTG            |
|                                        | U1-70K exon 8 EcoRI rev                                     | GACTAGGAATTCCTAGCCGCCGGGCCT              |
|                                        | U1-70K intron 6 fwd                                         | TGAAGGACAGAGAGGGTCTGAGG                  |
|                                        | U1-70K exon 7 rev                                           | AGTGCATGTCTCGCTCGTGTTT                   |
|                                        | U1-70K exon 7 fwd 1                                         | GAACACGAGCGAGACATGCACT                   |
|                                        | U1-70K intron 7 rev 1                                       | CTCCCAGGTTACACACACAC                     |
|                                        | U1-70K exon 7 fwd 2                                         | GTGTGTGTGTGAACCTGGGGAG                   |
|                                        | U1-70K intron 7 rev 2                                       | GGAAGAGAGGGCAGGTTCAAAGG                  |
|                                        | U1-70K exon 7 fwd 3                                         | CCTTTGAACCTGCCCTCTCTTCC                  |
|                                        | U1-70K intron 7 rev 3                                       | ATTAATACGGCGGCCCTGGAC                    |
|                                        | U1-70K exon 7 fwd 4                                         | GTCCAGGGGCCCGCGTATTAAT                   |
|                                        | U1-70K intron 7 rev 4                                       | CTCCTGAGCTGCCTGGCTAAG                    |
| U1-70K exon 7 fwd 5                    | CTTAGCCAGGCAGCTCAGGAG                                       |                                          |

|                                        |                        |                              |
|----------------------------------------|------------------------|------------------------------|
|                                        | U1-70K intron 7 rev 5  | GTCATCAGAGGCTGGGTGGAAC       |
| <b>U1-70K minigene<br/>mutagenesis</b> | U1-70K 5'ss A mut fwd  | CACCTCAGTGTATGACTGGTATAAGG   |
|                                        | U1-70K 5'ss A mut rev  | CCTTATACCAGTCATACACTGAGGTG   |
|                                        | U1-70K 5'ss B mut fwd  | TAAGGACTTGTATCATGGGTAAGATCAC |
|                                        | U1-70K 5'ss B mut rev  | GTGATCTTACCCATGATACAAGTCCTTA |
|                                        | U1-70K 5'ss C mut fwd  | TAAGGGTTTGTATCATGGACAAGATCAC |
|                                        | U1-70K 5'ss C mut rev  | GTGATCTTGTCCATGATACAAACCCTTA |
|                                        | U1-70K 5'ss BC mut fwd | TAAGGACTTGTATCATGGACAAGATCAC |
|                                        | U1-70K 5'ss BC mut rev | GTGATCTTGTCCATGATACAAGTCCTTA |
